# Supplementary material for: Microbubbles in combination with focused ultrasound for the delivery of quercetin-modified sulfur nanoparticles through the blood brain barrier into the brain parenchyma and relief of endoplasmic reticulum stress to treat Alzheimer's disease
Source: Royal Society of Chemistry journal article supplement (doi:10.1039/c9nr09713a), 2020-01-01
Supplement: c9nr09713a1.pdf [file c9nr09713a1.pdf]

**Microbubbles in combination with focused ultrasound to deliver Quercetin-modified sulfur nanoparticles: through the blood brain barrier into the brain parenchyma and relieve endoplasmic reticulum stress to treat Alzheimer's disease**

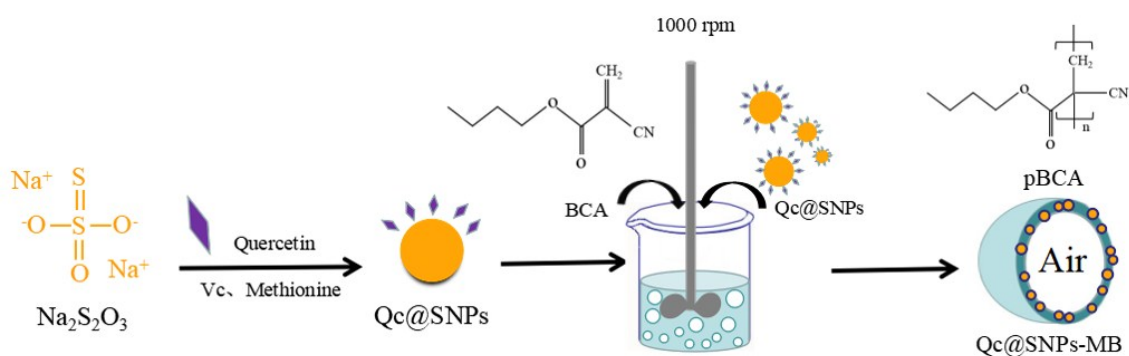

**Figure. S1.** Schematic diagram of Qc@SNPs-MB synthesis.

**Regular MB**

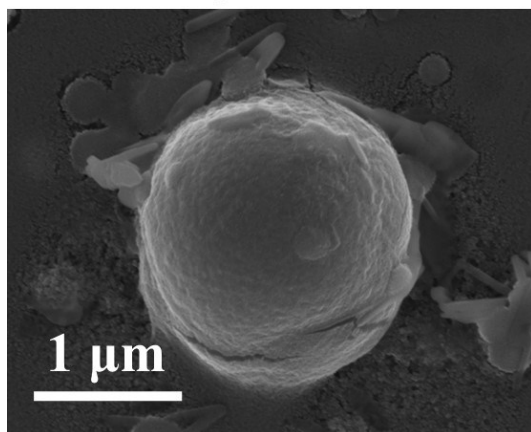

**Figure. S2.** SEM images of regular MB.

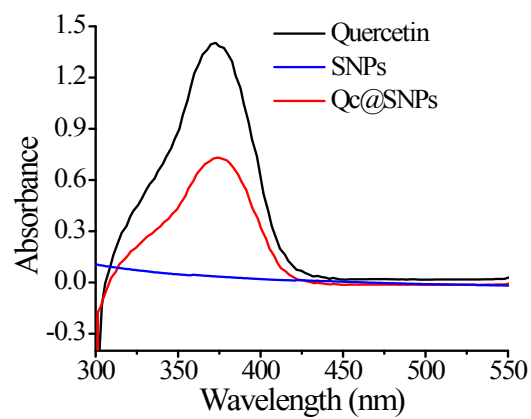

**Figure. S3.** UV-vis spectra of Quercetin, SNPs and Qc@SNPs.

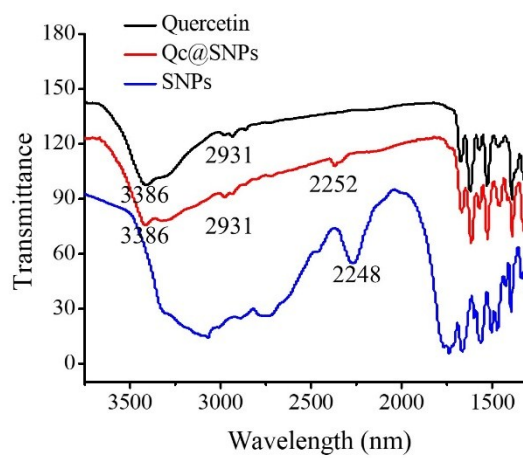

**Figure. S4.** FT-IR spectra of Quercetin, SNPs and Qc@SNPs.

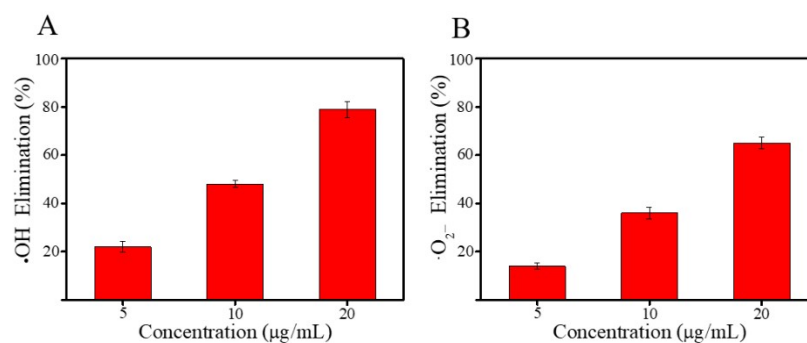

**Figure. S5.** Qc@SNPs scavenging efficiency for hydroxyl radicals and superoxide anions.

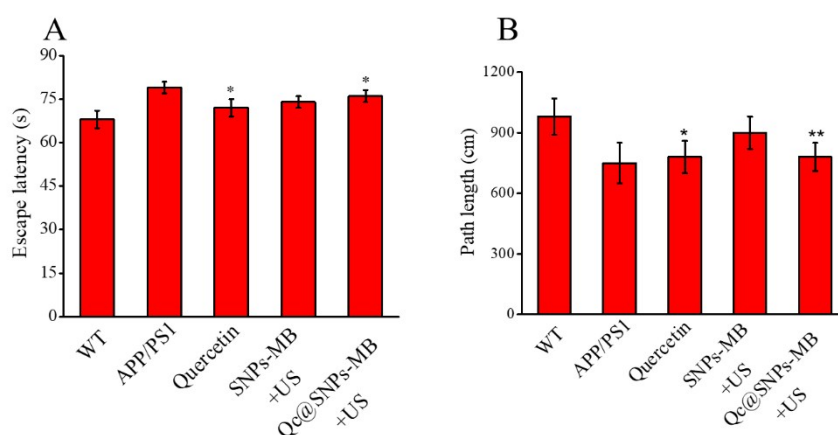

**Figure. S6.** The therapeutic effect of NPs in AD mice. (A-B) The learning ability and behavior of AD mice were evaluated by water maze test. The labels \*, \*\*, and \*\*\* indicate  $p < 0.05$ ,  $p < 0.01$ , and  $p < 0.001$ , respectively, compared with the APP/PS1 group.
